# Supplementary material for: Questionnaire Survey of Possible Association of Allergic Diseases with Adverse Reactions to SARS-CoV-2 Vaccination
Source: MDPI journal article supplement (doi:10.3390/vaccines9121421), 2021-12-01
Supplement: s1 [file s1]

**Suppl Table S2. Multiple comparison of intensities in each adverse reaction between individual age groups**

| <b>Adverse effects</b>    | <b>Age group 1</b> | <b>Age group 2</b> | <b><math>\chi^2</math> Value</b> | <b>P Value</b> |
|---------------------------|--------------------|--------------------|----------------------------------|----------------|
| <u>First dose</u>         |                    |                    |                                  |                |
| Local Injection reactions |                    |                    |                                  |                |
| Pain                      | 20s                | 50s                | 12.6521                          | 0.0131         |
|                           | 20s                | >60s               | 11.0491                          | 0.0260         |
|                           | 30s                | 50s                | 13.8466                          | 0.0078         |
|                           | 30s                | >60s               | 11.8974                          | 0.0181         |
|                           | 40s                | 50s                | 13.3937                          | 0.0095         |
|                           | 40s                | >60s               | 11.5829                          | 0.0207         |
| Swelling                  | 20s                | 50s                | 22.4743                          | 0.0002         |
| Systemic reactions        |                    |                    |                                  |                |
| Fever                     | 20s                | 50s                | 10.5470                          | 0.0322         |
| <u>Second dose</u>        |                    |                    |                                  |                |
| Local Injection reactions |                    |                    |                                  |                |
| Pain                      | 20s                | >60s               | 9.8609                           | 0.0428         |
|                           | 30s                | >60s               | 13.1379                          | 0.0106         |
| Systemic reactions        |                    |                    |                                  |                |
| Fatigability              | 20s                | >60s               | 11.8102                          | 0.0188         |
|                           | 30s                | >60s               | 16.8911                          | 0.0020         |
|                           | 40s                | >60s               | 13.5932                          | 0.0087         |
| Muscle pain               | 30s                | >60s               | 9.6616                           | 0.0465         |
| Joint pain                | 30s                | 50s                | 11.4283                          | 0.0221         |
|                           | 30s                | >60s               | 9.6268                           | 0.0472         |
| Fever                     | 20s                | 50s                | 11.4900                          | 0.0216         |
|                           | 20s                | >60s               | 18.3107                          | 0.0011         |
|                           | 30s                | >60s               | 12.3980                          | 0.0146         |
|                           | 40s                | >60s               | 10.8564                          | 0.0282         |
