# Supplementary material for: Questionnaire Survey of Possible Association of Allergic Diseases with Adverse Reactions to SARS-CoV-2 Vaccination
Source: MDPI journal article supplement (doi:10.3390/vaccines9121421), 2021-12-01
Supplement: s1 [file s1]

**Suppl Table S4. Multiple comparison of intensities in headache after the second dose among the recipients with each allergic diseases and those without any of the diseases**

| <b>Disease group 1</b> | <b>Disease group 2</b> | <b><math>\chi^2</math> Value</b> | <b>P Value</b> |
|------------------------|------------------------|----------------------------------|----------------|
| No allergic disease    | AD                     | 0.0891                           | 0.9999         |
| No allergic disease    | BA                     | 3.2191                           | 0.6663         |
| No allergic disease    | FA                     | 9.5591                           | 0.0887         |
| No allergic disease    | Pollinosis             | 1.2529                           | 0.9397         |
| No allergic disease    | Hand eczema            | 0.4915                           | 0.9924         |
| AD                     | BA                     | 1.8152                           | 0.8741         |
| AD                     | FA                     | 6.8298                           | 0.2336         |
| AD                     | Pollinosis             | 0.2289                           | 0.9988         |
| AD                     | Hand eczema            | 0.1840                           | 0.9993         |
| BA                     | FA                     | 1.7671                           | 0.8803         |
| BA                     | Pollinosis             | 1.3878                           | 0.9256         |
| BA                     | Hand eczema            | 0.5459                           | 0.9903         |
| FA                     | Pollinosis             | 6.6935                           | 0.2445         |
| FA                     | Hand eczema            | 3.7153                           | 0.5911         |
| Pollinosis             | Hand eczema            | 0.0191                           | 1.0000         |

**Abbreviations.** AD: atopic dermatitis; BA: bronchial asthma; FA: food allergies.
