# Supplementary material for: Questionnaire Survey of Possible Association of Allergic Diseases with Adverse Reactions to SARS-CoV-2 Vaccination
Source: MDPI journal article supplement (doi:10.3390/vaccines9121421), 2021-12-01
Supplement: s1 [file s1]

**Suppl Table S3. Multiple comparison of intensities in fatigability after the first dose among the recipients with each allergic diseases and those without any of the diseases**

| <b>Disease group 1</b> | <b>Disease group 2</b> | <b><math>\chi^2</math> Value</b> | <b>P Value</b> |
|------------------------|------------------------|----------------------------------|----------------|
| No allergic disease    | AD                     | 0.3222                           | 0.9972         |
| No allergic disease    | BA                     | 10.4835                          | 0.0626         |
| No allergic disease    | FA                     | 1.6846                           | 0.8908         |
| No allergic disease    | Pollinosis             | 1.9760                           | 0.8525         |
| No allergic disease    | Hand eczema            | 1.5666                           | 0.9053         |
| AD                     | BA                     | 10.2690                          | 0.0680         |
| AD                     | FA                     | 2.2982                           | 0.8065         |
| AD                     | Pollinosis             | 2.4166                           | 0.7890         |
| AD                     | Hand eczema            | 2.1884                           | 0.8225         |
| BA                     | FA                     | 1.2967                           | 0.9353         |
| BA                     | Pollinosis             | 6.0605                           | 0.3004         |
| BA                     | Hand eczema            | 1.7583                           | 0.8815         |
| FA                     | Pollinosis             | 0.4194                           | 0.9948         |
| FA                     | Hand eczema            | 0.0125                           | 1.0000         |
| Pollinosis             | Hand eczema            | 0.2990                           | 0.9977         |

**Abbreviations.** AD: atopic dermatitis; BA: bronchial asthma; FA: food allergies.
