# Supplementary material for: Questionnaire Survey of Possible Association of Allergic Diseases with Adverse Reactions to SARS-CoV-2 Vaccination
Source: MDPI journal article supplement (doi:10.3390/vaccines9121421), 2021-12-01
Supplement: s1 [file s1]

Suppl Table S1.

Questionnaire to Adverse Effects of SARS-CoV-2 Vaccination

Please put check mark ☒ on each question

※Refer to another sheet to respond to Question 4 and 5

1. Your gender and age

【Gender】 ☐ Male ☐ Female ☐ Other

【Age (years)】 ☐ -19 ☐ 20-29 ☐ 30-39 ☐ 40-49 ☐ 50-50 ☐ 60-69 ☐ 70-79 ☐ 80-

2. Present illness or past histories of diseases

☐ Atopic dermatitis ☐ Bronchial asthma ☐ Food allergy ☐ Pollinosis ☐ Hand eczema

Other allergic diseases ( )

3. If you took medicine related to Question 2 diseases upon vaccination, please specify it.

Name(s) of medicine ( )

| 4. <u>Adverse effects after 1<sup>st</sup> dose</u> | Mild                                   | Moderate                 | High                             | Severe                   |
|-----------------------------------------------------|----------------------------------------|--------------------------|----------------------------------|--------------------------|
| <input type="checkbox"/> Pain at injection site     | <input type="checkbox"/>               | <input type="checkbox"/> | <input type="checkbox"/>         | <input type="checkbox"/> |
| <input type="checkbox"/> Redness at injection site  | <input type="checkbox"/>               | <input type="checkbox"/> | <input type="checkbox"/>         | <input type="checkbox"/> |
| <input type="checkbox"/> Swelling at injection sit  | <input type="checkbox"/>               | <input type="checkbox"/> | <input type="checkbox"/>         | <input type="checkbox"/> |
| <input type="checkbox"/> Itching at injection site  | <input type="checkbox"/>               | <input type="checkbox"/> | <input type="checkbox"/>         | <input type="checkbox"/> |
| <input type="checkbox"/> Headache                   | <input type="checkbox"/>               | <input type="checkbox"/> | <input type="checkbox"/>         | <input type="checkbox"/> |
| <input type="checkbox"/> Tiredness                  | <input type="checkbox"/>               | <input type="checkbox"/> | <input type="checkbox"/>         | <input type="checkbox"/> |
| <input type="checkbox"/> Muscle pain                | <input type="checkbox"/>               | <input type="checkbox"/> | <input type="checkbox"/>         | <input type="checkbox"/> |
| <input type="checkbox"/> Joint pain                 | <input type="checkbox"/>               | <input type="checkbox"/> | <input type="checkbox"/>         | <input type="checkbox"/> |
| <input type="checkbox"/> Fever                      | <input type="checkbox"/> 37.5°C-37.9°C |                          | <input type="checkbox"/> 38.0°C- |                          |
| <input type="checkbox"/> Anaphylaxis                |                                        |                          |                                  |                          |

Other symptoms ( )

| 5. <u>Adverse effects after 2<sup>nd</sup> dose</u> | Mild                                   | Moderate                 | High                             | Severe                   |
|-----------------------------------------------------|----------------------------------------|--------------------------|----------------------------------|--------------------------|
| <input type="checkbox"/> Pain at injection site     | <input type="checkbox"/>               | <input type="checkbox"/> | <input type="checkbox"/>         | <input type="checkbox"/> |
| <input type="checkbox"/> Redness at injection site  | <input type="checkbox"/>               | <input type="checkbox"/> | <input type="checkbox"/>         | <input type="checkbox"/> |
| <input type="checkbox"/> Swelling at injection sit  | <input type="checkbox"/>               | <input type="checkbox"/> | <input type="checkbox"/>         | <input type="checkbox"/> |
| <input type="checkbox"/> Itching at injection site  | <input type="checkbox"/>               | <input type="checkbox"/> | <input type="checkbox"/>         | <input type="checkbox"/> |
| <input type="checkbox"/> Headache                   | <input type="checkbox"/>               | <input type="checkbox"/> | <input type="checkbox"/>         | <input type="checkbox"/> |
| <input type="checkbox"/> Tiredness                  | <input type="checkbox"/>               | <input type="checkbox"/> | <input type="checkbox"/>         | <input type="checkbox"/> |
| <input type="checkbox"/> Muscle pain                | <input type="checkbox"/>               | <input type="checkbox"/> | <input type="checkbox"/>         | <input type="checkbox"/> |
| <input type="checkbox"/> Joint pain                 | <input type="checkbox"/>               | <input type="checkbox"/> | <input type="checkbox"/>         | <input type="checkbox"/> |
| <input type="checkbox"/> Fever                      | <input type="checkbox"/> 37.5°C-37.9°C |                          | <input type="checkbox"/> 38.0°C- |                          |
| <input type="checkbox"/> Anaphylaxis                |                                        |                          |                                  |                          |

Other symptoms ( )

6. If you took medicine before vaccination, please specify it.

【Before 1<sup>st</sup> dose】 Medicine ( )

【Before 2<sup>nd</sup> dose】 Medicine ( )

7. If you took medicine after vaccination for Question 4 and 5 symptoms, please specify it.

【After 1<sup>st</sup> dose】 Medicine ( )

【After 2<sup>nd</sup> dose】 Medicine ( )

8. If you have any opinions or views, please tell us.
