# Supplementary material for: Questionnaire Survey of Possible Association of Allergic Diseases with Adverse Reactions to SARS-CoV-2 Vaccination
Source: Vaccines (Basel). 2021 Dec 1;9(12):1421. doi: 10.3390/vaccines9121421 (PMC8708946; doi:10.3390/vaccines9121421)
Supplement: Supplementary file 1 [file vaccines-09-01421-s001.zip]

Archive with 4 entries (4 files):
- Suppl Table S1.pdf
- Suppl Table S2.pdf
- Suppl Table S3.pdf
- Suppl Table S4.pdf
